## RESEARCH ARTICLE

# The relation between project team conflict and user resistance in software projects

Simon Vrhovec <sup>\*</sup>, Blaž Markelj

Faculty of Criminal Justice and Security, University of Maribor, Ljubljana, Slovenia

<sup>\*</sup> [simon.vrhovec@um.si](mailto:simon.vrhovec@um.si)

## Abstract

This study aims to explore the relation between conflict in the project team and user resistance to change in software projects. Following a cross-sectional research design, a survey was conducted among 1,000 largest companies in Slovenia (N = 114). The results of PLS-SEM analysis indicate that task and process conflicts in the project team are associated with user resistance. This study is among the first to associate conflict within the project team and user resistance in the implementing organization. It is also one of the first studies to investigate the relations between different types of conflict and user resistance. Project managers may invest resources into adequately managing conflicts within the project team related to tasks in which the project team interacts with users of developed software to lower user resistance. Project with poorly defined roles (e.g., agile and information security projects) may be more prone to user resistance than projects with clearly defined roles.

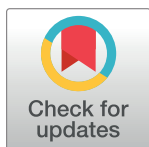

## OPEN ACCESS

**Citation:** Vrhovec S, Markelj B (2021) The relation between project team conflict and user resistance in software projects. PLoS ONE 16(11): e0260059. <https://doi.org/10.1371/journal.pone.0260059>

**Editor:** Rogis Baker, Universiti Pertahanan Nasional Malaysia, MALAYSIA

**Received:** September 30, 2021

**Accepted:** October 30, 2021

**Published:** November 16, 2021

**Copyright:** © 2021 Vrhovec, Markelj. This is an open access article distributed under the terms of the [Creative Commons Attribution License](https://creativecommons.org/licenses/by/4.0/), which permits unrestricted use, distribution, and reproduction in any medium, provided the original author and source are credited.

**Data Availability Statement:** All relevant data are within the manuscript and its [Supporting information](#) files.

**Funding:** The authors received no specific funding for this work.

**Competing interests:** The authors have declared that no competing interests exist.

## 1 Introduction

Organizations are continuously investing in information technology for improved productivity and innovation gains [1]. The gains of new software are dependent on the implementation success and adoption by key stakeholders [1, 2]. Resistance to change, sometimes referred to more specifically as user resistance or more generally as stakeholder resistance [3, 4], is among the most significant barriers to the adoption of new software in various contexts, such as healthcare [4–7], government services [8], supply chain [9], human resources [10], decision support [11], knowledge sharing [12], information security [13, 14], IT services [15] and software development [16], and so forth.

Resistance to change has been extensively researched for over seven decades aiming to explain why and how individuals resist change, including information systems and software implementations [2, 3]. Even though it has a negative connotation, resistance is neither negative nor positive by itself and can contribute to better project outcomes [3]. The causes of resistance to change have been linked to organizational, social, political, technical and contextual factors [4]. Antecedents of resistance to change are related to various stakeholders (e.g., users, management, customers) [3].

In this study, we focus on user resistance in software projects. Several antecedents of user resistance were identified in information systems research. For example, user resistance may

be related to users' perceptions about the new technology and about the impact of new technology on their work routines [2, 17]. Similarly, user resistance has been associated with the costs associated with switching to the new way of working [1, 18]. The published literature also suggests that various kinds of perceived threats to an individual (e.g., perceived loss of professional autonomy, perceived dissatisfaction, threats to status, knowledge) also relate to user resistance [1, 3, 4, 17]. Resistance to change is however not only about work as social and power relations are also important in organizations. For example, user resistance may be associated with social influence and norms [1, 18], authoritarian leadership style [19], top management support [20] and struggle for power [3]. Although most research on user resistance focused on factors directly associated with users and their organizational context as presented, user resistance has been also associated with issues related to the change implementation itself (e.g., communication issues, user involvement) [3, 17, 21, 22]. Nevertheless, research on the associations between matters going on within the project team developing new software and user resistance seems particularly scarce as, to the best of our knowledge, has not been directly investigated before.

When individuals with varying values work together, conflict is practically unavoidable [23]. Conflict can be categorized into three key types: relationship, task and process conflict [24–26]. *Relationship conflict* refers to disagreements and incompatibilities between individuals regarding personal issues that are not related to tasks [23]. *Task conflict* refers to differences in opinions, viewpoints and ideas about how tasks should be performed [26, 27]. *Process conflict* refer to varying opinions about how tasks are successfully achieved (e.g., responsibilities and resource delegation) [24, 26]. Like resistance to change, studies show that conflict can contribute to better project outcomes [28]. While relationship conflict is generally associated with negative consequences [29], task and process conflicts may be associated with both negative and positive outcomes depending on how they are handled [28–30]. Task and process conflicts are also commonly referred to as constructive conflict [28, 29].

Team conflict has been well-researched in information systems research. For example, conflict has been studied in the context of software development process and software projects [26, 27, 29, 31–33], employee well-being [23, 25], creativity and innovation [28, 34], organizational and team performance [30, 35]. Literature on resistance and team conflict has been however developed separately with few studies attempting to merge knowledge from both streams of research [36]. Although the relationship between user resistance and conflict in the implementing organization has been investigated before [4, 19, 36–38], it remains unclear whether conflict within a project team is related to user resistance in the implementing organization.

The primary objective of this study is to investigate how is project team conflict related to user resistance in software projects thus addressing the above presented gaps in our knowledge. This paper makes two key contributions to the literature. First, this is one of the first studies to investigate the impact of conflict within software project teams on resistance to project outcomes thus contributing to the literature on resistance to change. Second, this study further contributes to the resistance to change literature by being among the first studies to directly associate different types of conflict within software project teams with user resistance in the implementing organization.

## 2 Research model

In this study, we propose and empirically test a research model comprising of three hypotheses. User resistance has been related to various conflicting interests between stakeholders in the implementing organization [3, 4, 39]. Project teams however often involve members external to the implementing organization (e.g., software development is outsourced to software

companies). Nevertheless, matters internal to the project team may affect the user resistance in the implementing organization even if the project is fully outsourced as it may affect antecedents of user resistance, such as communication and user involvement [3, 17, 21, 22]. Since all three types of conflicts can affect team performance [24, 30, 35], including the performance of the interaction with users of developed software, we posit the following hypotheses:

*H1*: Relationship conflict is positively associated with user resistance to change.

*H2*: Task conflict is positively associated with user resistance to change.

*H3*: Process conflict is positively associated with user resistance to change.

## 3 Method

### 3.1 Design

A cross-sectional survey research design was used to explore the associations between conflict and resistance to change related to software projects.

### 3.2 Ethical considerations

This study did not require an approval from the Institutional Review Board according to the legislation of the Republic of Slovenia and internal acts of the University of Maribor.

### 3.3 Measures

Theoretical constructs were defined and operationalized as presented in Table 1. All measured constructs were reflective, and their items were adapted from previously validated items. Items for *relationship conflict*, *task conflict* and *process conflict* were adapted from [24]. Items for *resistance to change* were adapted from [40]. All items were measured by using a 7-point Likert scale from 1 “strongly disagree” to 5 “strongly agree”.

The survey was distributed in Slovenian which was the primary language of all respondents in our study. All items were developed by following a predefined protocol as follows. The questionnaire was first developed in English and then translated into Slovenian. To ensure the consistency between the Slovenian and English questionnaire, the Slovenian questionnaire was translated back to English. No significant differences in the meaning between the original items in English and back-translations were noticed.

### 3.4 Sample and data collection

We conducted a survey among the heads of IT departments (i.e., unit of observation). The heads of IT departments have an insight into IT projects, including software projects, conducted at their companies. We first asked them to choose an important software project that has finished in the last three years and that they remember well (i.e., unit of analysis). Heads of IT departments were then asked to complete the survey about the chosen project.

**Table 1. Definitions of theoretical constructs.**

| Theoretical construct      | Operational definition                                                            |
|----------------------------|-----------------------------------------------------------------------------------|
| Relationship conflict [RC] | The extent of relationship conflict in a software project.                        |
| Task conflict [TC]         | The extent of task conflict in a software project.                                |
| Process conflict [PC]      | The extent of process conflict in a software project.                             |
| Resistance to change [RtC] | The extent of to which resistance to change manifested due to a software project. |

<https://doi.org/10.1371/journal.pone.0260059.t001>

The population of the web survey consisted of heads of IT departments in 1,000 largest companies in Slovenia. A total of 117 respondents completed the survey providing for a response rate of 11.7 percent. After excluding poorly completed responses, we were left with  $N = 114$  useful responses for further analysis. The data were gathered from February to June 2016.

[Table 2](#) provides an overview of the project sample characteristics.

### 3.5 Data analysis

Consistent partial least squares structural equation modeling (PLSc-SEM) was used to test the proposed research model. PLSc-SEM is suitable for analyzing data when the sample size is

**Table 2. Sample characteristics.**

|                                                                      | Frequency | Percent |
|----------------------------------------------------------------------|-----------|---------|
| <b>Software development methodology</b>                              |           |         |
| Agile methodology                                                    | 9         | 7.9     |
| Traditional methodology                                              | 37        | 32.5    |
| No formal methodology                                                | 68        | 59.6    |
| <b>Software type</b>                                                 |           |         |
| New custom software solution                                         | 32        | 28.1    |
| Customized standard software solution from a local provider          | 39        | 34.2    |
| Customized standard software solution from an international provider | 42        | 36.8    |
| N/A                                                                  | 1         | 0.9     |
| <b>Project team size</b>                                             |           |         |
| Up to 5 team members                                                 | 28        | 24.6    |
| 6–10 team members                                                    | 46        | 40.4    |
| 11–15 team members                                                   | 12        | 10.5    |
| 16–20 team members                                                   | 9         | 7.9     |
| 21–25 team members                                                   | 2         | 1.8     |
| 26 and more team members                                             | 11        | 9.6     |
| N/A                                                                  | 6         | 5.3     |
| <b>Project costs</b>                                                 |           |         |
| Less than 100,000 €                                                  | 67        | 58.8    |
| Between 100,000 € and 250,000 €                                      | 21        | 18.4    |
| Between 250,000 € and 500,000 €                                      | 12        | 10.5    |
| Between 500,000 € and 1,000,000 €                                    | 4         | 3.5     |
| Between 1,000,000 € and 2,500,000 €                                  | 4         | 3.5     |
| Between 2,500,000 € and 5,000,000 €                                  | 3         | 2.6     |
| Between 5,000,000 € and 10,000,000 €                                 | 1         | 0.9     |
| 10,000,000 € or more                                                 | 1         | 0.9     |
| N/A                                                                  | 1         | 0.9     |
| <b>Project duration</b>                                              |           |         |
| Less than 3 months                                                   | 17        | 14.9    |
| Between 3 and 6 months                                               | 30        | 26.3    |
| Between 6 and 12 months                                              | 33        | 28.9    |
| Between 12 and 18 months                                             | 11        | 9.6     |
| Between 18 and 24 months                                             | 7         | 6.1     |
| Between 24 and 30 months                                             | 3         | 2.6     |
| 36 months or more                                                    | 3         | 2.6     |
| N/A                                                                  | 10        | 8.8     |

<https://doi.org/10.1371/journal.pone.0260059.t002>

small [41] as is the case in our study. The collected data were processed with IBM SPSS Statistics 28 (descriptive statistics only), R version 3.6.3, and cSEM version 0.4.0 [42].

There were 0.9 percent missing values which were imputed with medians before data analysis with PLSc-SEM. The survey instrument was first validated with a confirmatory factor analysis. Construct items were tested for their reliability, convergent validity and discriminant validity. Reliability was tested by calculating composite reliability (*CR*). Values above 0.60 are acceptable and values above 0.70 are recommended [43]. Convergent validity was determined examining average variance extracted (*AVE*). Values above 0.50 are recommended however values below this threshold may be acceptable if *CR* is adequate [43, 44]. Discriminant validity was determined by heterotrait-monotrait ratio of correlations (HTMT) analysis.

A structural model was then constructed to test the hypotheses. The structural models were estimated with bootstrap resampling with 5,000 replications.

## 4 Results

### 4.1 Instrument validation

A measurement model was developed to validate the survey instrument. Table 3 presents *CR*, *AVE* and HTMT analysis which are relevant for determining the validity and reliability of the survey instrument. First, *CR* ranged from 0.732 to 0.907 thus exceeding the commonly accepted threshold 0.70. This demonstrates adequate reliability of all constructs. Next, *AVE* ranged from 0.549 to 0.766. Values above the 0.50 threshold are generally considered as adequate therefore indicating adequate convergent validity. Additionally, factor loadings (see Table 4) except for TC1 were above the 0.70. A low factor loading for TC1 may be an indication that this item may not measure the corresponding theoretical construct well. After carefully considering the other items (i.e., TC2 and TC3) and comparing our results to the results in published literature (e.g., [24]), we found no obvious reasons for a low factor loading. Explanations for the divergence may thus need to be sought elsewhere. For example, published literature measured task conflict for on-going group activities but our study measured task conflict for a recently completed project. It is possible that respondents better or more strongly remember conflicts of ideas (TC1,  $M_{TC1} = 3.50$ ) than disagreements about tasks (TC2,  $M_{TC2} = 2.78$ ) or conflicting opinions about the project (TC3,  $M_{TC3} = 3.04$ ). Since all other indicators suggested adequate convergent validity, we nevertheless did not consider this as a serious issue. Finally, HTMT ratios of correlations were all below the conservative 0.85 threshold thus indicating adequate discriminant validity of the survey instrument.

To reduce the likelihood of social desirability bias, we informed the respondents that participation in the research is voluntary and anonymous.

**Table 3. Validity and reliability of the survey instrument.** Composite reliability (*CR*), average variance extracted (*AVE*), and heterotrait-monotrait ratio of correlations (HTMT) analysis.

| Construct | <i>CR</i> | <i>AVE</i> | 1     | 2     | 3     |
|-----------|-----------|------------|-------|-------|-------|
| 1. RC     | 0.891     | 0.732      |       |       |       |
| 2. TC     | 0.759     | 0.549      | 0.622 |       |       |
| 3. PC     | 0.907     | 0.766      | 0.801 | 0.601 |       |
| 4. RtC    | 0.732     | 0.577      | 0.613 | 0.616 | 0.684 |

Notes: RC—relationship conflict; TC—task conflict; PC—process conflict; RtC—resistance to change.

<https://doi.org/10.1371/journal.pone.0260059.t003>

**Table 4. Questionnaire items.**

| Construct             | Loading | Item                                                                                                         | Source |
|-----------------------|---------|--------------------------------------------------------------------------------------------------------------|--------|
| Relationship conflict | 0.873   | RC1. There has been much relationship tension in the project team.                                           | [24]   |
|                       | 0.908   | RC2. People often got angry while working in the project team.                                               | [24]   |
|                       | 0.780   | RC3. There has been much emotional conflict in the project team.                                             | [24]   |
| Task conflict         | 0.301   | TC1. There has been much conflict of ideas in the project team.                                              | [24]   |
|                       | 0.862   | TC2. There have been frequent disagreements within the project team about the task of the project.           | [24]   |
|                       | 0.902   | TC3. People in the project team frequently had conflicting opinions about the project.                       | [24]   |
| Process conflict      | 0.850   | PC1. There have been frequent disagreements about who should do what in the project team.                    | [24]   |
|                       | 0.957   | PC2. There have been many conflicts about task responsibilities in the project team.                         | [24]   |
|                       | 0.812   | PC3. There have been frequent disagreements about resource allocation in the project team.                   | [24]   |
| Resistance to change  | 0.774   | RtC1. There have been many users resisting the project or the deployed solution.                             | [40]   |
|                       | 0.746   | RtC2. There have been many cases in which user departments did not reply to the request of the project team. | [40]   |

<https://doi.org/10.1371/journal.pone.0260059.t004>

### 4.2 Structural model

A structural model was developed to test the hypotheses. Fig 1 presents standardized path coefficients, their *p*-values, effect sizes  $f^2$ , and adjusted  $R^2$ . Predictor constructs (i.e., relationship conflict, task conflict and process conflict) explain a meaningful share of variance of the predicted construct (i.e., resistance to change) thus indicating that the results are meaningful.

The results support hypotheses H2 ( $p = 0.076$ ) and H3 ( $p = 0.030$ ). Nevertheless, both associations have small effect sizes (i.e.,  $f^2 < 0.15$ ). The results however do not support hypothesis H1 ( $p > 0.10$ ).

The summary of hypotheses testing is presented in Table 5.

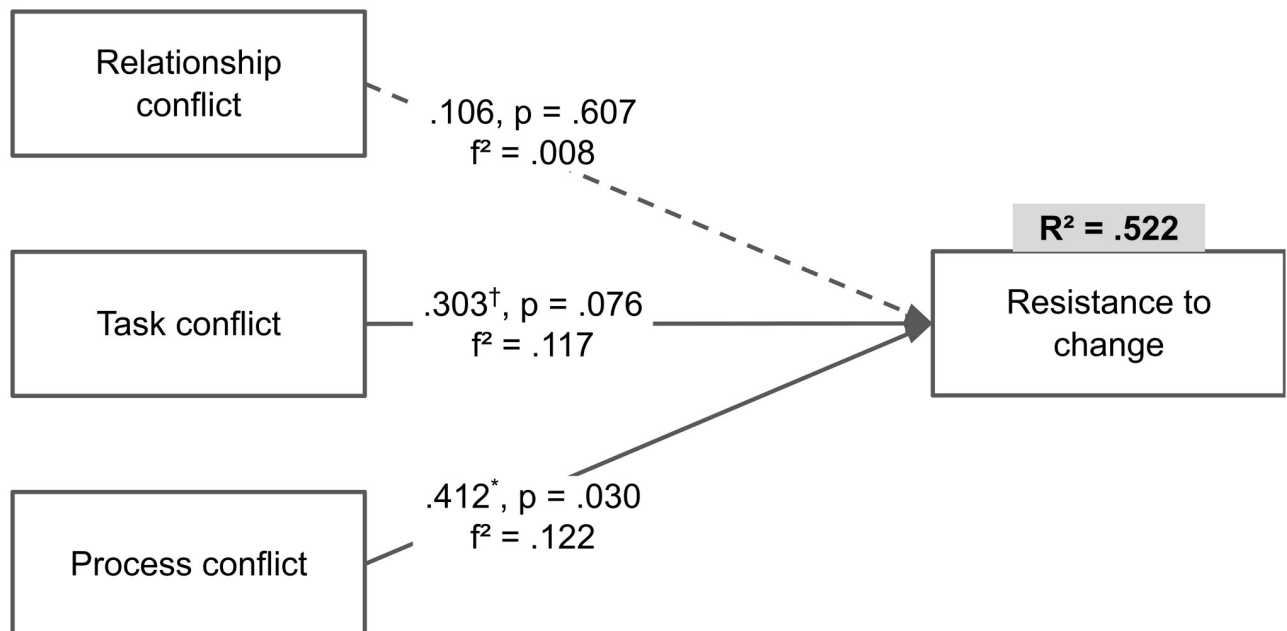

**Fig 1. Structural model.** Notes:  $^\dagger p < 0.10, * p < 0.05$ .

<https://doi.org/10.1371/journal.pone.0260059.g001>

Table 5. Hypotheses testing summary.

| Hypothesis |                                                                                | Evidence                                     | Conclusion    |
|------------|--------------------------------------------------------------------------------|----------------------------------------------|---------------|
| H1         | Relationship conflict is positively associated with user resistance to change. | Non-significant positive path                | Not supported |
| H2         | Task conflict is positively associated with user resistance to change.         | Significant positive path, small effect size | Supported     |
| H3         | Process conflict is positively associated with user resistance to change.      | Significant positive path, small effect size | Supported     |

<https://doi.org/10.1371/journal.pone.0260059.t005>

## 5 Discussion

The purpose of this study was to investigate how is project team conflict related to user resistance in software projects. The results of our study suggest several theoretical and practical implications as discussed in the following subsections.

### 5.1 Theoretical implications

This study has several theoretical implications. First, this study provides evidence that conflict within the project team are related to user resistance in the implementing organization. This contributes to the literature on resistance to change by broadening the sources of user resistance due to conflict beyond the conflict between stakeholders in the implementing organization (e.g., struggle for power) [3, 4, 39]. Although users are not directly involved in project team conflicts and may not be even aware of them, the results of our study indicate that the consequences of those conflicts may affect them nevertheless. Although we employed a cross-sectional research design, the nature of the studied phenomena suggests a causal relation between project team conflict and user resistance. User resistance can occur at any stage of the implementation (i.e., pre-implementation, during implementation and post-implementation) [3] and may therefore precede the start of the project and the formation of the project team. It may be nevertheless more likely that resistance to change was caused by poor communication or disappointing user involvement due to conflict in the project team than conflict within the project team caused by user resistance. User resistance may not emerge during a software project, and its team members may not be aware of it even if it would or may simply underestimate its extent until late in a project [20].

Second, the results of our study suggest that only constructive (i.e., task and process [28]) conflict is associated with resistance to change. The absence of a significant association between relationship conflict and user resistance to change may offer additional support for assuming a causal relationship between conflicts and resistance since constructive conflict is directly related to project tasks, including tasks in which the project team interacts with users. These activities, such as activity on social media, are related to user resistance [21]. Since resistance to change is a symptom resulting from an underlying root cause [3], a positive relationship between constructive conflict and resistance to change indicates that constructive conflict was probably not managed adequately in our sample. Improving conflict management may therefore help to tackle resistance to change. This is analogue to existing research suggesting that adequate conflict management in the implementing organization can result in decreased user resistance [19].

### 5.2 Practical implications

This study also has some practical implications for different stakeholders. First, project managers should focus on management of conflict within the project team related to tasks in which the project team interacts with users to lower the probability of manifestation of user resistance. This study may offer project managers a new perspective on the priorities for conflict

management. Although management of conflicts related to software development is important, project managers need to keep an eye on “auxiliary” tasks (such as communication activities and user involvement) too since they may significantly affect the overall project success beyond the iron triangle (i.e., time, cost and quality).

Second, software projects with poorly defined, unclear or ambiguous roles (e.g., agile software development and information security, especially in small and medium enterprises without information security departments) may be more prone to user resistance than projects in which roles are clearly defined. For example, roles in information security are complex and may fuel process conflicts in software projects which include elements of information security [45]. With its rising importance for organizations, information security is becoming embedded in more and more software projects and often conflicts with the way employees have done their job for years [46].

### 5.3 Limitations and future research

Some limitations need to be considered when interpreting the results of this study. First, the study was conducted in a single country. The findings may not be applicable across different countries and cultural contexts. Future work in other countries would be helpful to address this limitation and broaden the ecological validity of this study. Second, the findings of this study may not be generalized to all types of companies by size, especially the small and micro companies since it was conducted among the 1,000 largest companies in Slovenia. Although a significant share of software projects were small or micro-sized, future studies including smaller companies (e.g., SMEs) would provide further valuable insights into the differences between companies varying by size. Third, we did not consider conflict management in our study. Future studies may study the role of conflict management styles and success in software projects. Fourth, we did not control whether users were part of the project team. User involvement by their inclusion in the project team may affect user resistance in a positive way, possibly affecting the role of project team conflicts. In addition to these considerations, future studies may investigate whether it matters which users are involved in the project team (e.g., opinion leaders). Fifth, our study only identified associations between conflicts and user resistance to change. More in-depth insights may be gained with other research designs, such as case study and action research. Sixth, this study investigated only the direct relation between project team conflict and user resistance. Since an indirect causal relation between conflict and resistance is likely, future studies exploring potential mediating factors, such as communication and user involvement would be valuable. Seventh, the study was conducted in 2016. Albeit there were no revolutionary changes in software development from the perspective of conflict and change management since the study was conducted, recent developments in these two fields may lower the ecological validity of this study. A replication study would therefore be useful in strengthening its ecological validity. Eighth, this study was conducted in a single industry. Comparative and cross-industry studies would be beneficial for determining whether the findings are relevant beyond the IT industry.

## Supporting information

### S1 Dataset. Survey data.

(CSV)

### S1 Text. Legend for survey data.

(TXT)



**S1 File. Survey questionnaire.**  
(PDF)

## Acknowledgments

We would like to express our sincere gratitude to the respondents who took their time to participate in our survey.

## Author Contributions

**Conceptualization:** Simon Vrhovec.

**Data curation:** Simon Vrhovec.

**Formal analysis:** Simon Vrhovec.

**Investigation:** Simon Vrhovec.

**Methodology:** Simon Vrhovec.

**Validation:** Blaž Markelj.

**Visualization:** Simon Vrhovec.

**Writing – original draft:** Simon Vrhovec.

**Writing – review & editing:** Blaž Markelj.

## References

1. Shirish A, Batuekueno L. Technology renewal, user resistance, user adoption: status quo bias theory revisited. *Journal of Organizational Change Management*. 2021; 34(5):874–893. <https://doi.org/10.1108/JOCM-10-2020-0332>
2. Laumer S, Maier C, Eckhardt A, Weitzel T. Work routines as an object of resistance during information systems implementations: theoretical foundation and empirical evidence. *European Journal of Information Systems*. 2016; 25(4):317–343. <https://doi.org/10.1057/ejis.2016.1>
3. Vrhovec SLR, Hovelja T, Vavpotič D, Krisper M. Diagnosing organizational risks in software projects: Stakeholder resistance. *International Journal of Project Management*. 2015; 33(6):1262–1273. <https://doi.org/10.1016/j.ijproman.2015.03.007>
4. Choi WS, Park J, Choi JYB, Yang JS. Stakeholders' resistance to telemedicine with focus on physicians: Utilizing the Delphi technique. *Journal of Telemedicine and Telecare*. 2019; 25(6):378–385. <https://doi.org/10.1177/1357633X18775853> PMID: 29792080
5. Kruse CS, Kristof C, Jones B, Mitchell E, Martinez A. Barriers to Electronic Health Record Adoption: a Systematic Literature Review. *Journal of Medical Systems*. 2016; 40(12):252. <https://doi.org/10.1007/s10916-016-0628-9> PMID: 27714560
6. Ebad SA. Healthcare software design and implementation—A project failure case. *Software: Practice and Experience*. 2020; 50(7):1258–1276.
7. Han L, Liu J, Evans R, Song Y, Ma J. Factors Influencing the Adoption of Health Information Standards in Health Care Organizations: A Systematic Review Based on Best Fit Framework Synthesis. *JMIR Medical Informatics*. 2020; 8(5):e17334. <https://doi.org/10.2196/17334> PMID: 32347800
8. Talukder MS, Chiong R, Corbitt B, Bao Y. Critical Factors Influencing the Intention to Adopt m-Government Services by the Elderly. *Journal of Global Information Management*. 2020; 28(4):74–94. <https://doi.org/10.4018/JGIM.2020100105>
9. Al-Odeh M, Altarazi S. Supply chain management information systems survey for Jordanian companies. *International Journal of Mathematical, Engineering and Management Sciences*. 2019; 4(3):567–579. <https://doi.org/10.33889/IJMEMS.2019.4.3-045>
10. Chabani Z. the Challenges Facing Public Organizations To Implement Human Resources Information Systems: a Case Study of Algeria. *Journal of Management Information and Decision Sciences*. 2020; 23(4):230–244.

11. Gómez Prada UE, Orellana Hernández ML, Salinas Ibañez JM. Systems Dynamics and Serious Video Games in an Appropriation Strategy of a Decision Support System for Small Livestock Farmers. *International Journal of Interactive Mobile Technologies (IJIM)*. 2020; 14(15):4. <https://doi.org/10.3991/ijim.v14i15.14597>
12. Khoza LT, Bwalya KJ. An Insider's Perspective of Knowledge Sharing in Software Development Projects. *Journal of Information & Knowledge Management*. 2021; 20(03):2150030. <https://doi.org/10.1142/S0219649221500301>
13. Sohrabi Safa N, Von Solms R, Furnell S. Information security policy compliance model in organizations. *Computers & Security*. 2016; 56:70–82. <https://doi.org/10.1016/j.cose.2015.10.006>
14. Ryttare E. Change Management: A Key in Achieving Successful Cyber Security [Master thesis]. Luleå University of Technology; 2019.
15. da Silva CD, Lins de Vasconcelos AM. Using the IDEAL model for the construction of a deployment framework of IT Service Desks at the Brazilian Federal Institutes of Education. *Software Quality Journal*. 2020; 28(3):895–929. <https://doi.org/10.1007/s11219-020-09499-x>
16. Mantovani Fontana R, Marczak S. Characteristics and Challenges of Agile Software Development Adoption in Brazilian Government. *Journal of technology management & innovation*. 2020; 15(2):3–10. <https://doi.org/10.4067/S0718-27242020000200003>
17. Alohali M, Carton F, O'Connor Y. Investigating the antecedents of perceived threats and user resistance to health information technology: a case study of a public hospital. *Journal of Decision Systems*. 2020; 29(1):27–52. <https://doi.org/10.1080/12460125.2020.1728988>
18. Li J, Liu M, Liu X. Why do employees resist knowledge management systems? An empirical study from the status quo bias and inertia perspectives. *Computers in Human Behavior*. 2016; 65:189–200. <https://doi.org/10.1016/j.chb.2016.08.028>
19. Zhang Y, Gao P, Zhang J, Lu L. Effect of authoritarian leadership on user resistance to change: evidence from IS project implementation in China. *Industrial Management & Data Systems*. 2020; 120(10):1813–1834. <https://doi.org/10.1108/IMDS-11-2019-0619>
20. Dong L, Neufeld D, Higgins C. Top Management Support of Enterprise Systems Implementations. *Journal of Information Technology*. 2009; 24(1):55–80. <https://doi.org/10.1057/jit.2008.21>
21. Naeem M. Understanding the role of social media in organizational change implementation. *Management Research Review*. 2020; 43(9):1097–1116. <https://doi.org/10.1108/MRR-07-2019-0336>
22. Hussein BA, Hafsel KH. Organisational influences impacting user involvement in a major information system project: a case study in a governmental organisation. *International Journal of Project Organisation and Management*. 2016; 8(1):24. <https://doi.org/10.1504/IJPOM.2016.075786>
23. Kuriakose V, S S, Jose H, Jose S. Testing activity reduces conflict associated strain (ARCAS) model. *Personnel Review*. 2019; 49(1):125–148. <https://doi.org/10.1108/PR-11-2018-0462>
24. Jehn KA, Mannix EA. The Dynamic Nature of Conflict: A Longitudinal Study of Intragroup Conflict and Group Performance. *Academy of Management Journal*. 2001; 44(2):238–251. <https://doi.org/10.5465/3069453>
25. Kuriakose V, S S, Jose H, M R A, Jose S. Process conflict and employee well-being. *International Journal of Conflict Management*. 2019; 30(4):462–489. <https://doi.org/10.1108/IJCM-12-2018-0142>
26. Williams RA. Conflict Propagation Within Large Technology and Software Engineering Programmes: A Multi-Partner Enterprise System Implementation as Case Study. *IEEE Access*. 2019; 7:167696–167713. <https://doi.org/10.1109/ACCESS.2019.2953952>
27. Lee JC, Wang YT, Chen CY. The effect of transactive memory systems on process tailoring in software projects: The moderating role of task conflict and shared temporal cognitions. *Journal of Systems and Software*. 2020; 164:110545. <https://doi.org/10.1016/j.jss.2020.110545>
28. Wan T, Wang Q, Xu K, Zhao J, Otsuki H. Research on innovation management of science and technology innovation team members based on constructive conflict evolution game. *Journal of Investigative Medicine*. 2021; 69(6):1245–1252. <https://doi.org/10.1136/jim-2020-001676> PMID: 33990371
29. Nesterkin DA, Porterfield TE, Li X. Relationship Conflict, Conflict Management, and Performance of Information Technology Teams. *Journal of Computer Information Systems*. 2016; 56(3):194–203. <https://doi.org/10.1080/08874417.2016.1153893>
30. Showkat S, Misra S. The nexus between diversity management (DM) and organizational performance (OP): mediating role of cognitive and affective diversity. *European Journal of Training and Development*. 2021. <https://doi.org/10.1108/EJTD-09-2020-0137>
31. Hewitt B, Walz DB, McLeod A. The Effect of Conflict and Knowledge Sharing on the Information Technology Project Team Performance. *International Journal of Knowledge Management*. 2020; 16(1):1–20. <https://doi.org/10.4018/IJKM.2020010101>

32. Shameem M, Chandra B, Kumar C, Khan AA. Understanding the Relationships Between Requirements Uncertainty and Nature of Conflicts: A Study of Software Development Team Effectiveness. *Arabian Journal for Science and Engineering*. 2018; 43(12):8223–8238. <https://doi.org/10.1007/s13369-018-3375-z>
33. Alok S, Raveendran J, Jha AK. Process conflict management among Indian software employees. *Journal of Indian Business Research*. 2015; 7(2):140–160. <https://doi.org/10.1108/JIBR-10-2014-0068>
34. Adeel A, Pengcheng Z, Saleem F, Ali R, Batool S. Conflicts and creative idea endorsement. *International Journal of Conflict Management*. 2019; 30(5):637–656. <https://doi.org/10.1108/IJCM-02-2019-0033>
35. Wickramasinghe V, Nandula S. Diversity in team composition, relationship conflict and team leader support on globally distributed virtual software development team performance. *Strategic Outsourcing: An International Journal*. 2015; 8(2/3):138–155. <https://doi.org/10.1108/SO-02-2015-0007>
36. Meissonier R, Houzé E. Toward an 'IT Conflict-Resistance Theory': action research during IT pre-implementation. *European Journal of Information Systems*. 2010; 19(5):540–561. <https://doi.org/10.1057/ejis.2010.35>
37. Saba PB, Saba M, Harfouche A. Identifying Disguised Objectives of IT Deployment Through Action Research. In: *Lecture Notes in Information Systems and Organisation*. vol. 30. Springer Nature; 2019. p. 69–82.
38. Boonstra A, de Vries J. Information system conflicts: Causes and types. *International Journal of Information Systems and Project Management*. 2015; 3(4):5–20.
39. Saba M, Bou Saba P, Harfouche A. Hidden facets of IT projects are revealed only after deployment. *Information Technology & People*. 2018; 31(1):239–255. <https://doi.org/10.1108/ITP-06-2016-0144>
40. Hong KK, Kim YG. The critical success factors for ERP implementation: an organizational fit perspective. *Information & Management*. 2002; 40(1):25–40. [https://doi.org/10.1016/S0378-7206\(01\)00134-3](https://doi.org/10.1016/S0378-7206(01)00134-3)
41. Hair JFJ, Matthews LM, Matthews RL, Sarstedt M. PLS-SEM or CB-SEM: updated guidelines on which method to use. *International Journal of Multivariate Data Analysis*. 2017; 1(2):107. <https://doi.org/10.1504/IJMDA.2017.10008574>
42. Rademaker ME, Schuberth F. cSEM: Composite-Based Structural Equation Modeling; 2020. Available from: <https://m-e-rademaker.github.io/cSEM/>.
43. Lin HC, Chang CM. What motivates health information exchange in social media? The roles of the social cognitive theory and perceived interactivity. *Information & Management*. 2018; 55(6):771–780. <https://doi.org/10.1016/j.im.2018.03.006>
44. Hu Lt, Bentler PM. Cutoff criteria for fit indexes in covariance structure analysis: Conventional criteria versus new alternatives. *Structural Equation Modeling: A Multidisciplinary Journal*. 1999; 6(1):1–55. <https://doi.org/10.1080/10705519909540118>
45. Burdon M, Coles-Kemp L. The significance of securing as a critical component of information security: An Australian narrative. *Computers & Security*. 2019; 87:101601. <https://doi.org/10.1016/j.cose.2019.101601>
46. Chang SE, Lin C. Exploring organizational culture for information security management. *Industrial Management & Data Systems*. 2007; 107(3):438–458. <https://doi.org/10.1108/02635570710734316>
